# Supplementary material
Source: PubMed Central journal article supplement (PMC6318037)
Supplement: NIHMS1504974-supplement-6.pdf [file NIHMS1504974-supplement-6.pdf]

**Supplementary Table 1. Summary of patient data.**

|                             | Breast Cancer    | Normal           |
|-----------------------------|------------------|------------------|
| n                           | 77               | 40               |
| Age, years (mean and range) | 39 (25-76)       | 35 (23-61)       |
| BMI (mean and range)        | 25.3 (18.5-43.6) | 25.1 (18.5-37.0) |
| Type                        |                  |                  |
| Ductal                      | 67 (87.0%)       |                  |
| Ductal+Lobular              | 5 (6.5%)         |                  |
| Lobular                     | 0                |                  |
| Inflammatory                | 3 (3.9%)         |                  |
| Type                        |                  |                  |
| DCIS                        | 1 (1.3%)         |                  |
| Luminal A                   | 8 (10.4%)        |                  |
| Luminal B                   | 40 (51.9%)       |                  |
| HER2 Positive               | 9 (11.7%)        |                  |
| Triple Negative             | 18 (23.4%)       |                  |
| Stage                       |                  |                  |
| 0                           | 1 (1.3%)         |                  |
| 1                           | 22 (28.6%)       |                  |
| 2                           | 35 (45.5%)       |                  |
| 3                           | 13 (16.9%)       |                  |
| 4                           | 4 (5.2%)         |                  |
| Recurrence                  | 10 (13.0%)       |                  |

BMI: body mass index

DCIS: ductal carcinoma in situ
