# Supplementary material
Source: PubMed Central journal article supplement (PMC6318037)

**A**

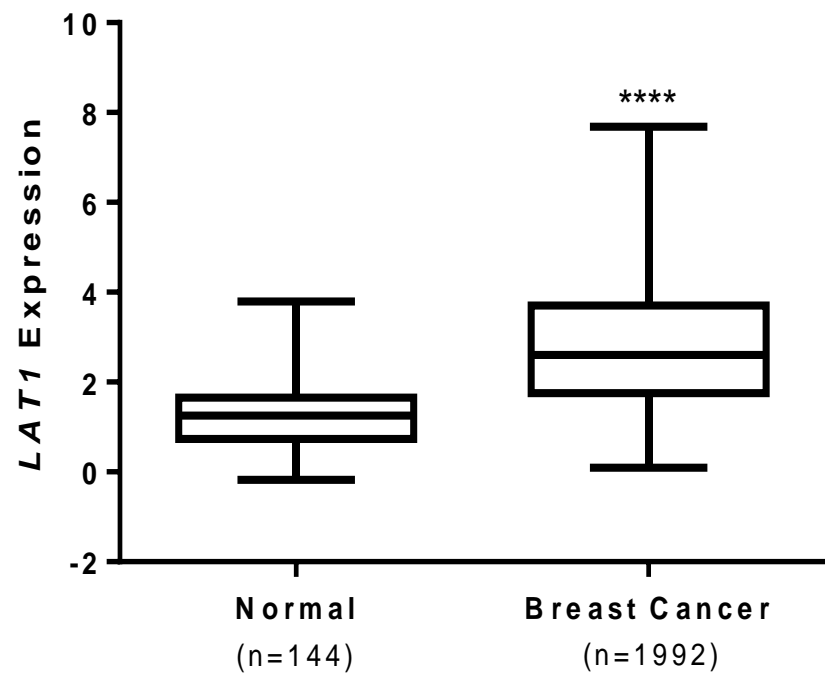

**B**

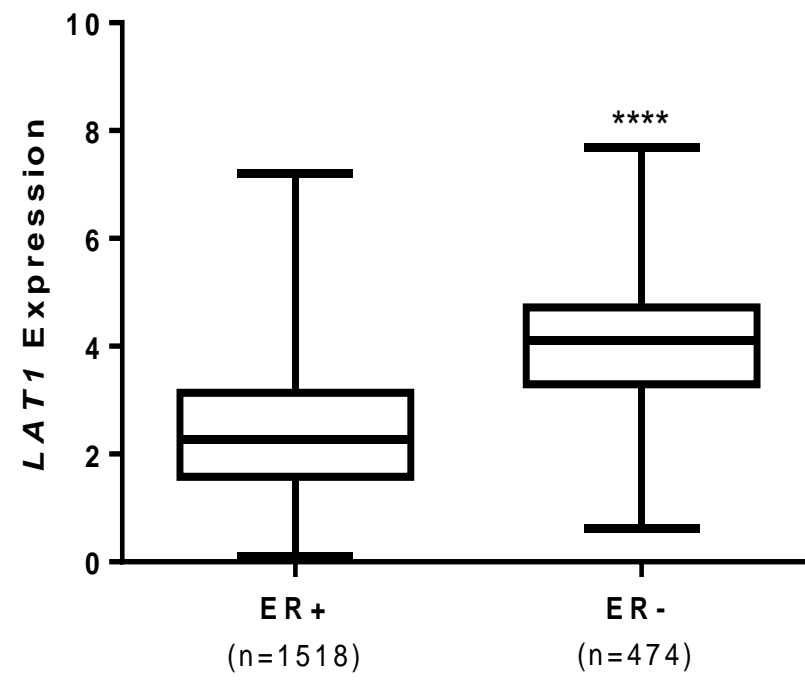

**C**

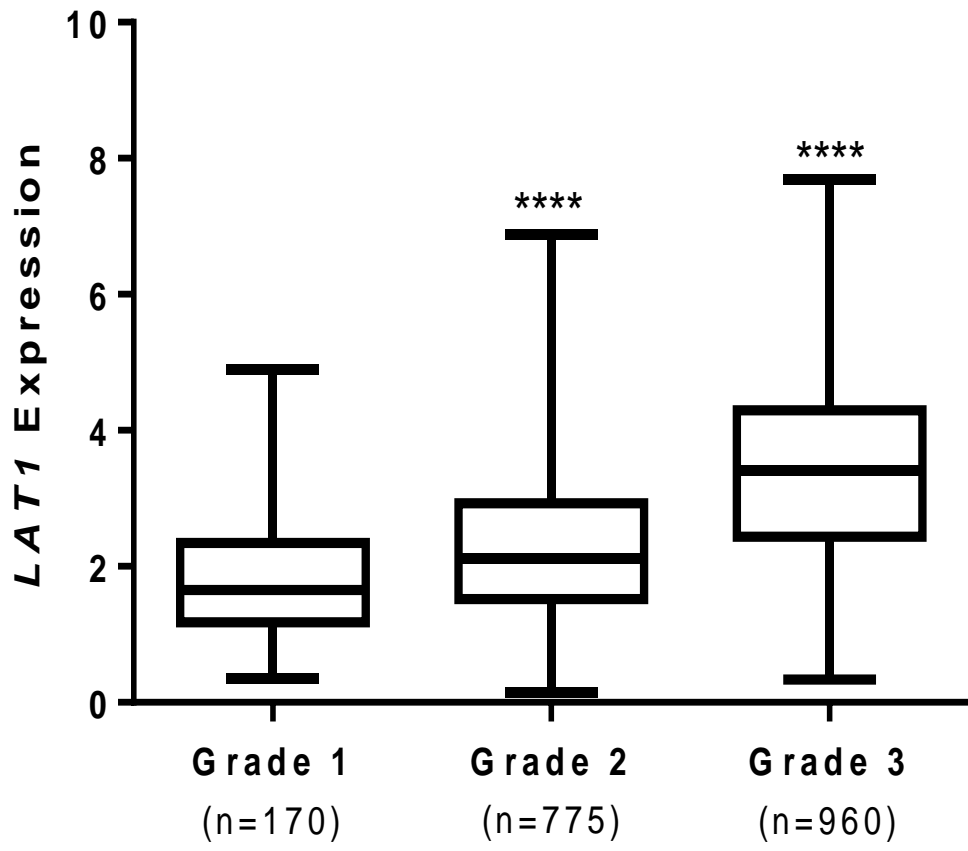

**D**

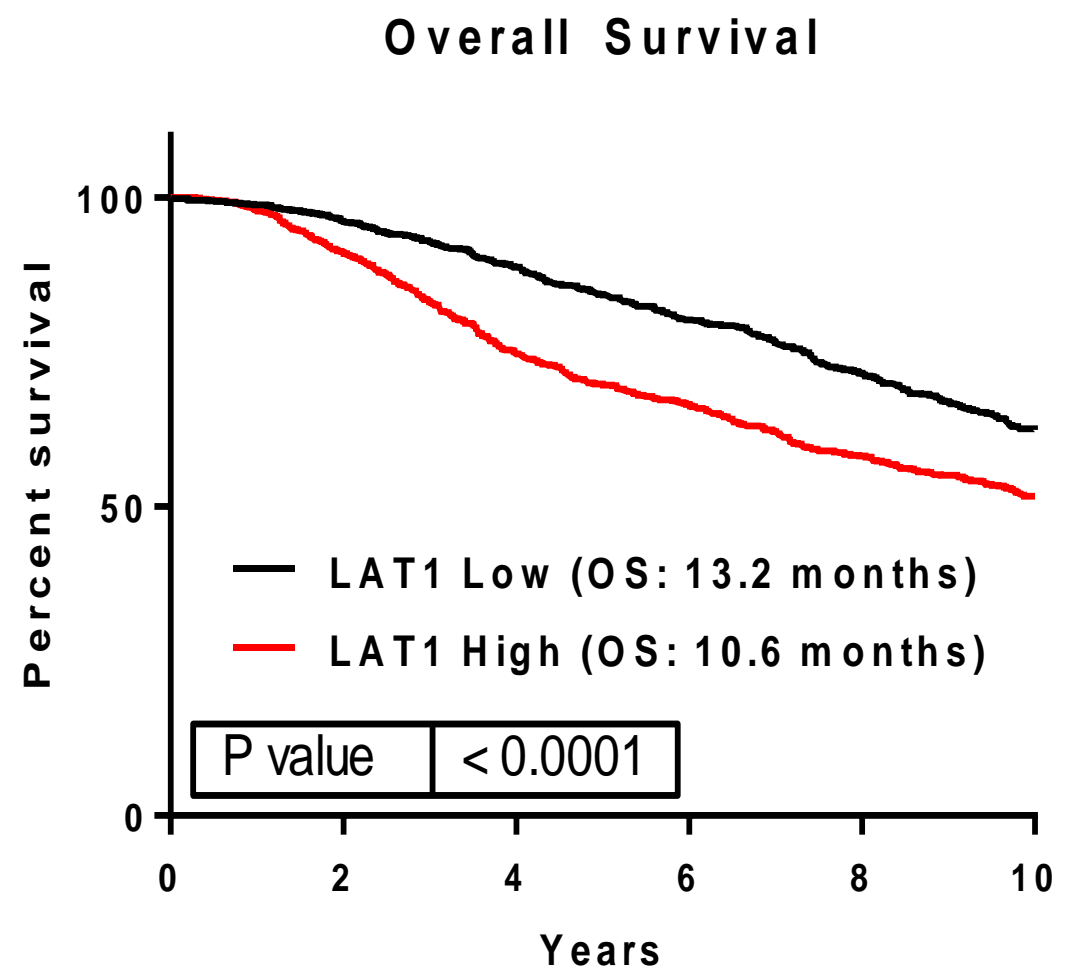

**E**

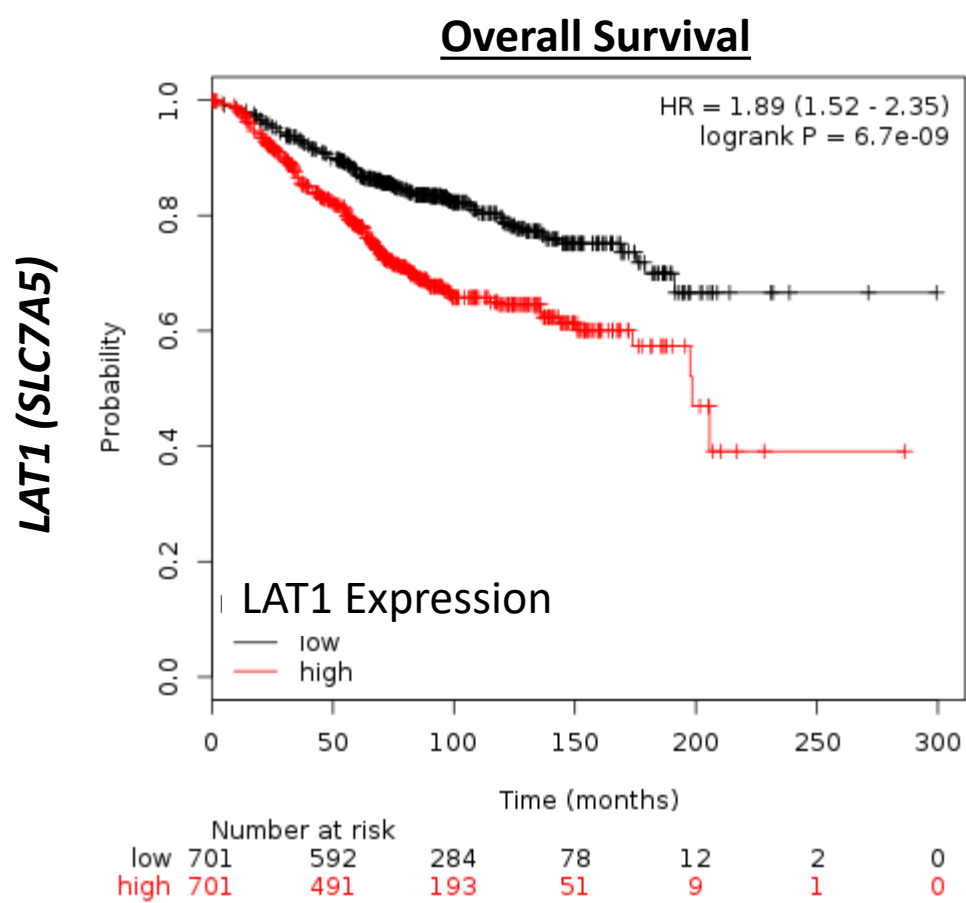

**F**

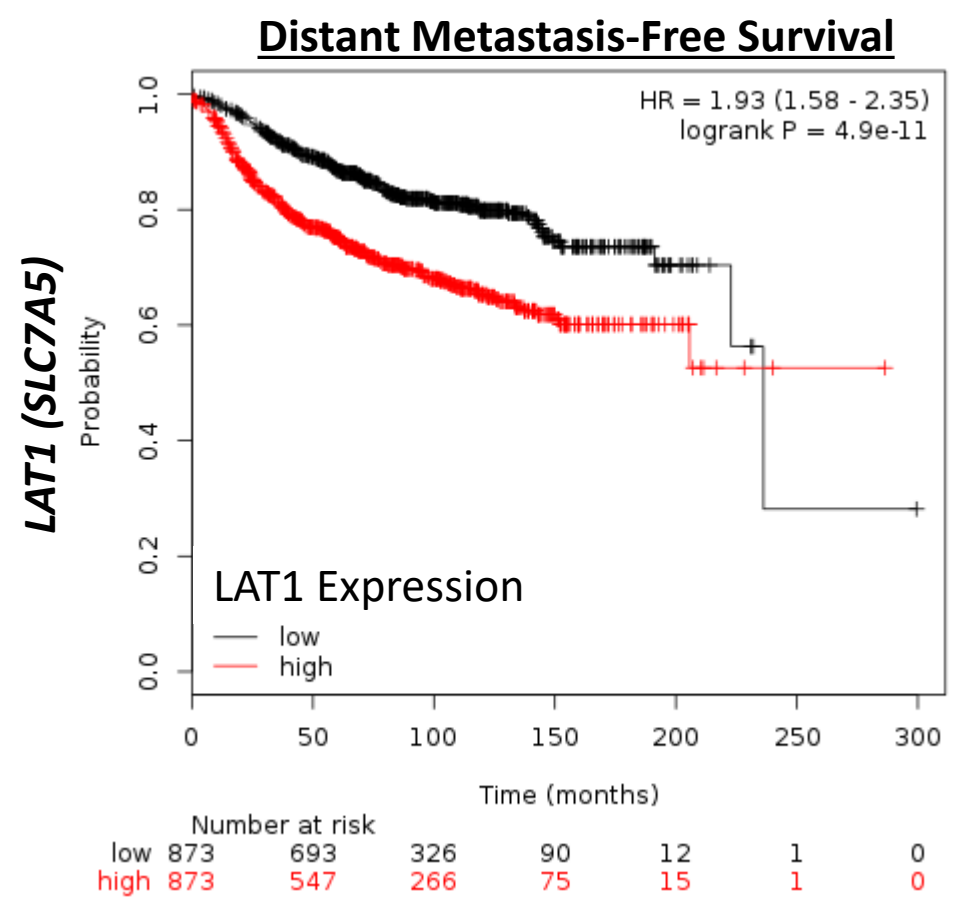

Supplement: NIHMS1504974-supplement-2.pdf [file NIHMS1504974-supplement-2.pdf]

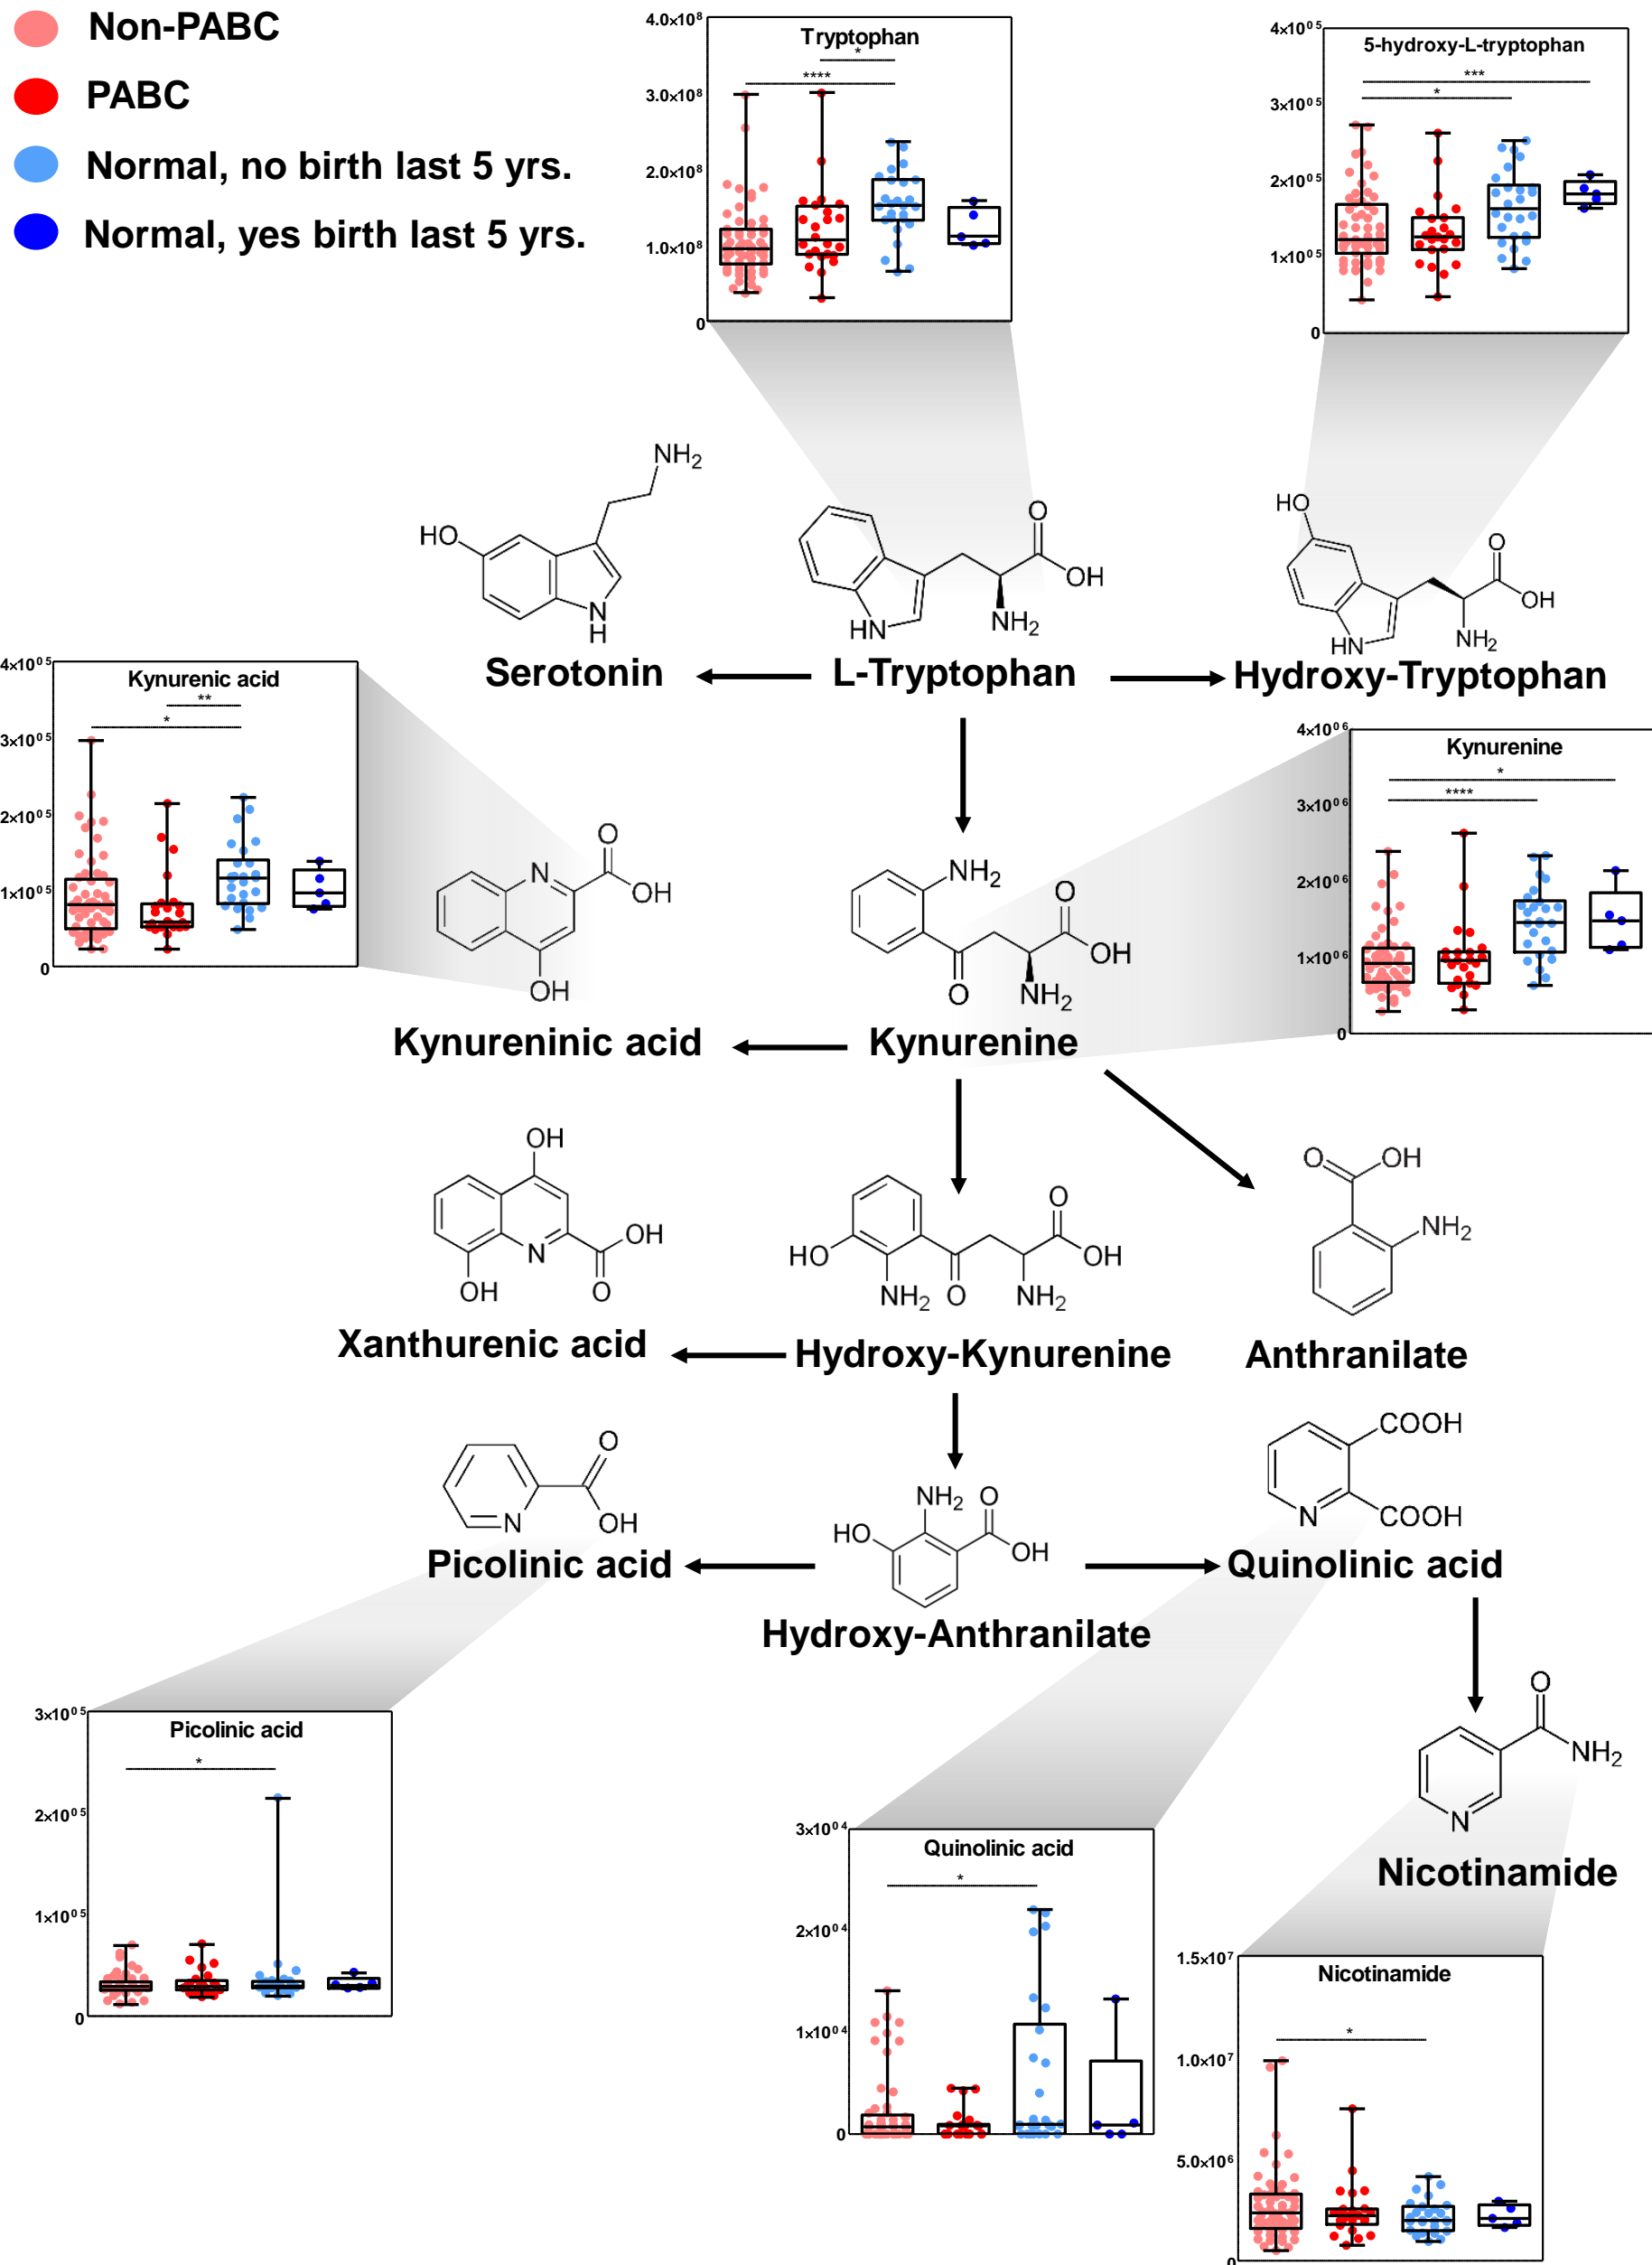

Supplement: NIHMS1504974-supplement-4.pdf [file NIHMS1504974-supplement-4.pdf]

- Stage I/II Breast Cancer
- Stage III/IV Breast Cancer

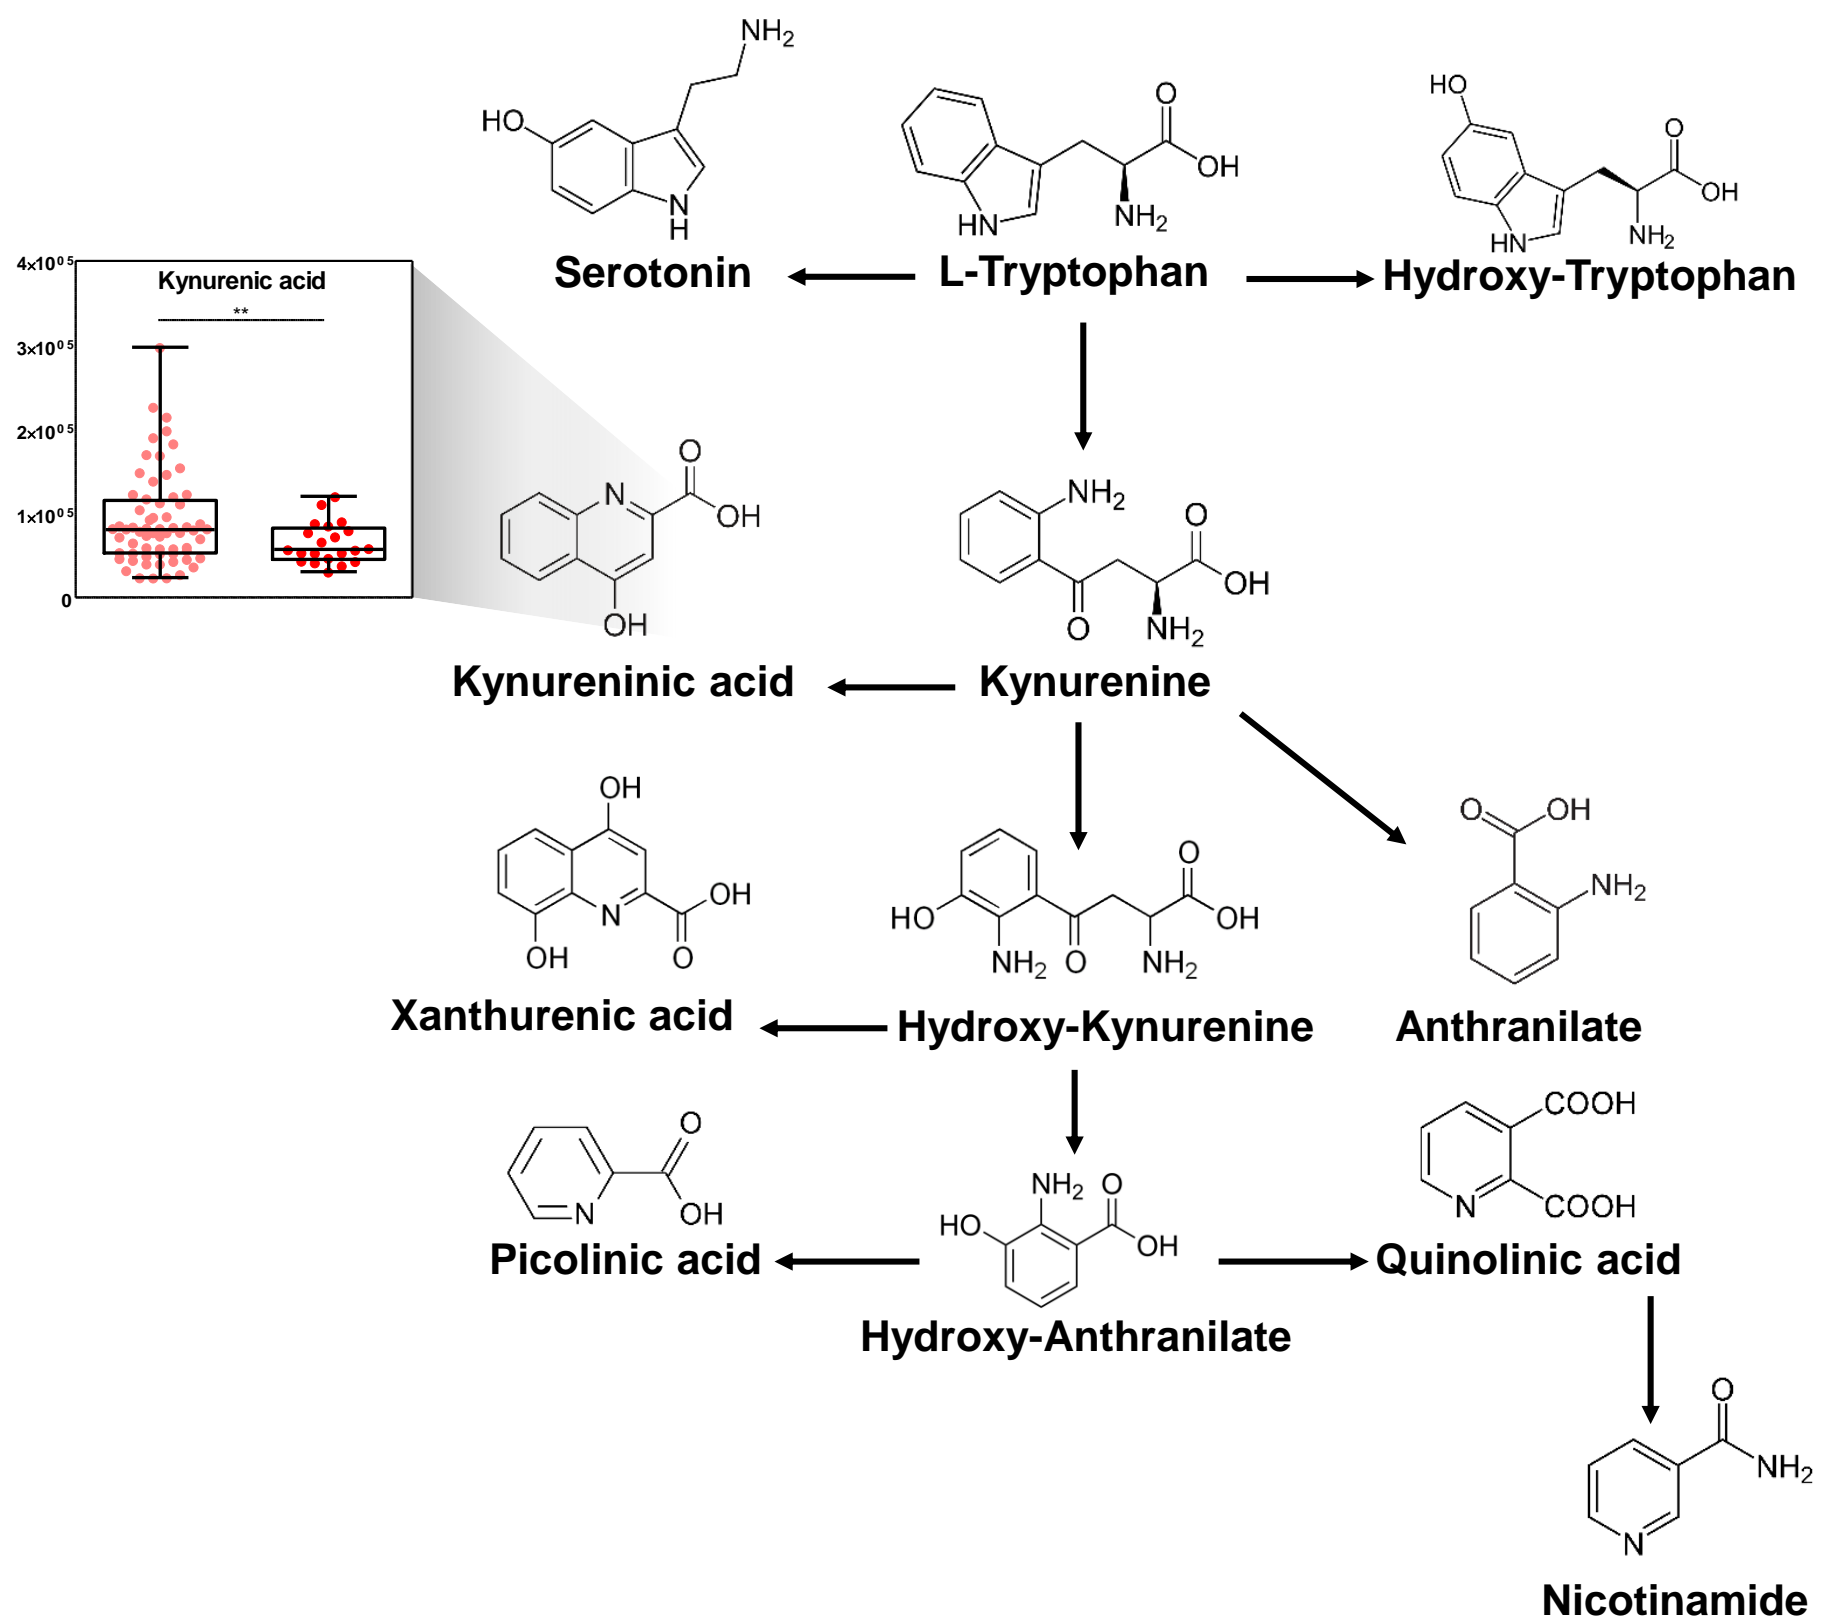

Supplement: NIHMS1504974-supplement-5.pdf [file NIHMS1504974-supplement-5.pdf]
